# Supplementary material
Source: PubMed Central journal article supplement (PMC10355945)

# Supporting Information Fig. S1. B-cell epitope prediction mapping on TMPRSS2, ERG and TMPRSS2:ERG

## A TMPRSS2; TMPRSS2:ERG

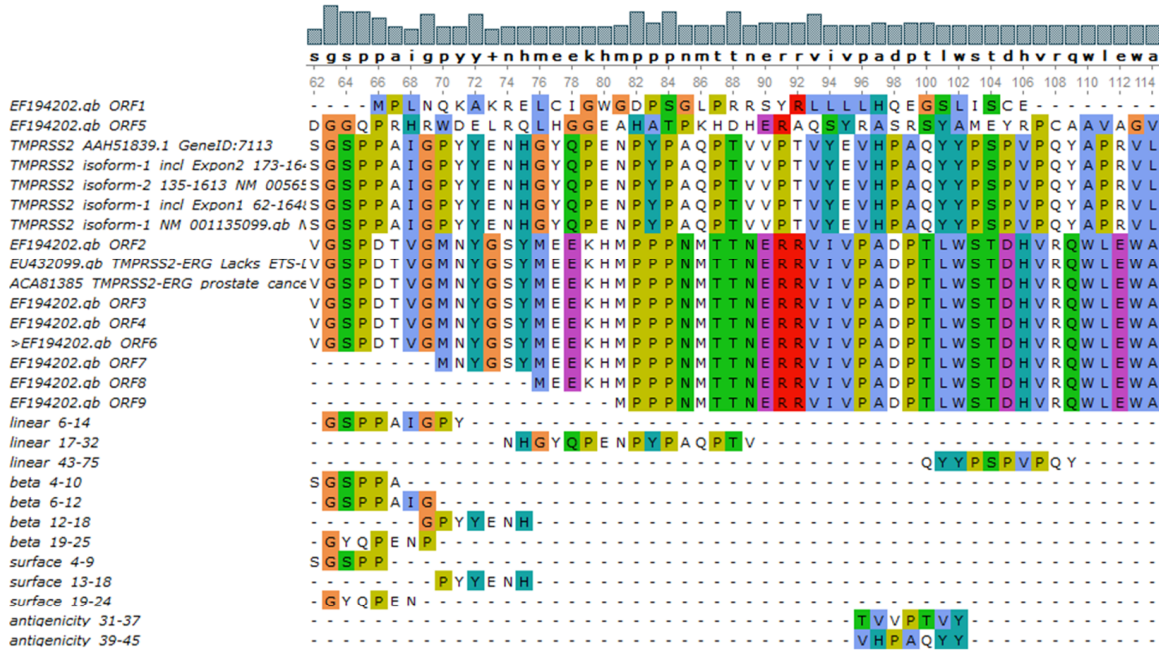

## B ERG; TMPRSS:ERG

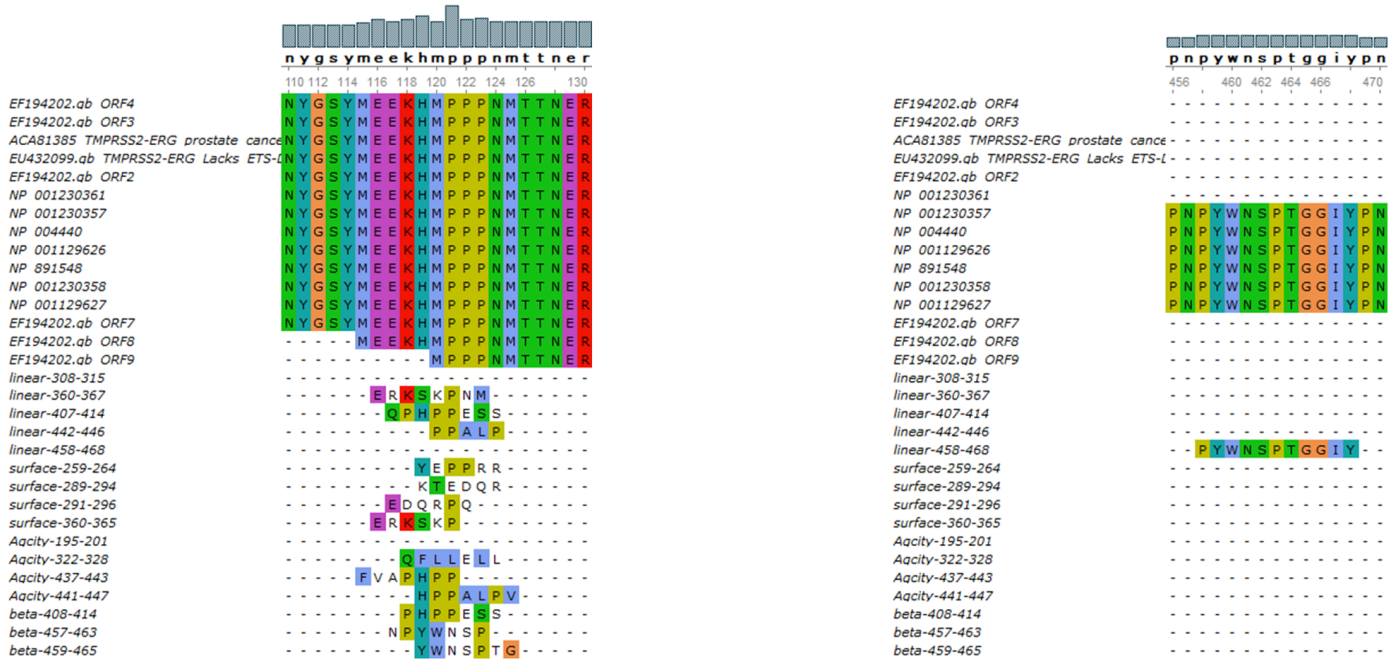

Supplement: 12672_2016_279_MOESM1_ESM.pdf [file 12672_2016_279_MOESM1_ESM.pdf]
