# Supplementary material
Source: PubMed Central journal article supplement (PMC10355945)

**Supporting Information Fig. S2.** Representative Amplification plot and Thermal Dissociation (Melting curve) plot of wt ERG isoforms 1 and 2 mRNA RT-qPCR amplification of total RNA templates acquired from VCaP cell lysate, patients' sera, increased risk male controls (age > 60) and healthy male and female donors.

Amplification Plots, mRNA ERG

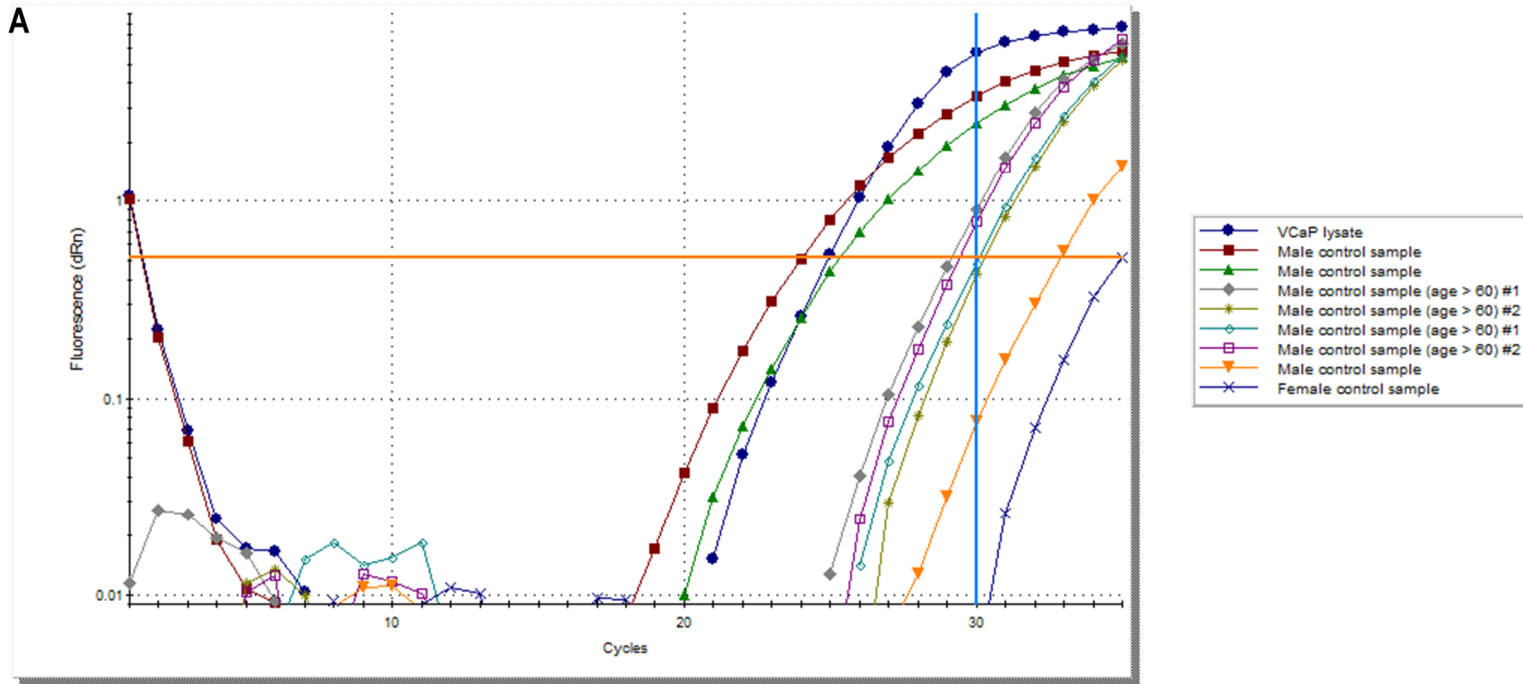

Dissociation Curve

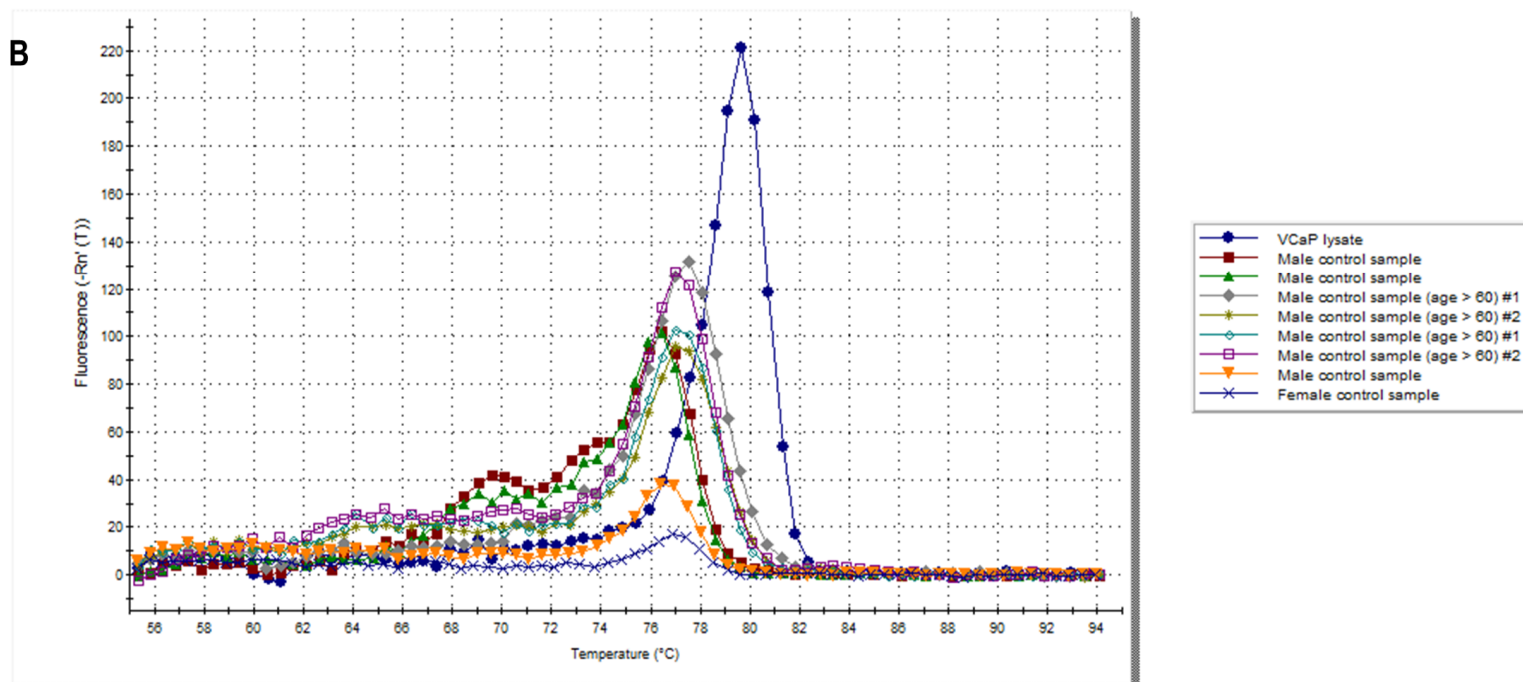

Supplement: 12672_2016_279_MOESM2_ESM.pdf [file 12672_2016_279_MOESM2_ESM.pdf]
