# Supplementary material
Source: PubMed Central journal article supplement (PMC10355945)

**Supporting Information Fig. S3.** (A-B) Relative ERG(5-6) (A) and ERG(6-7) (B) mRNA Fold Expression in VCaP cells after miR-204 mimic, miR-204 inhibitor or non-targeting control transfection.

**A**

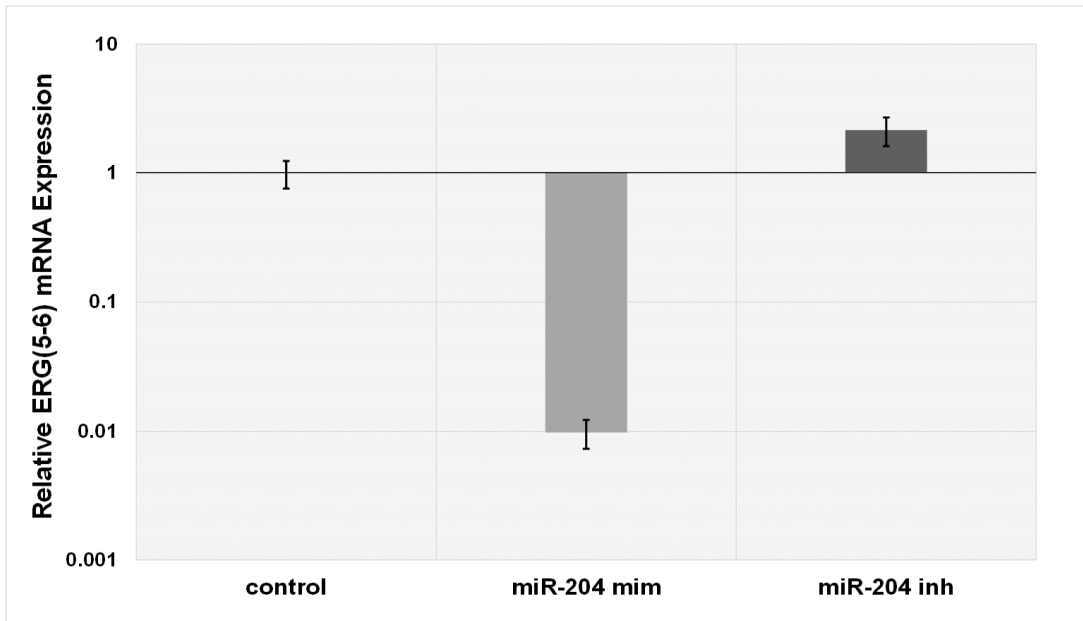

**B**

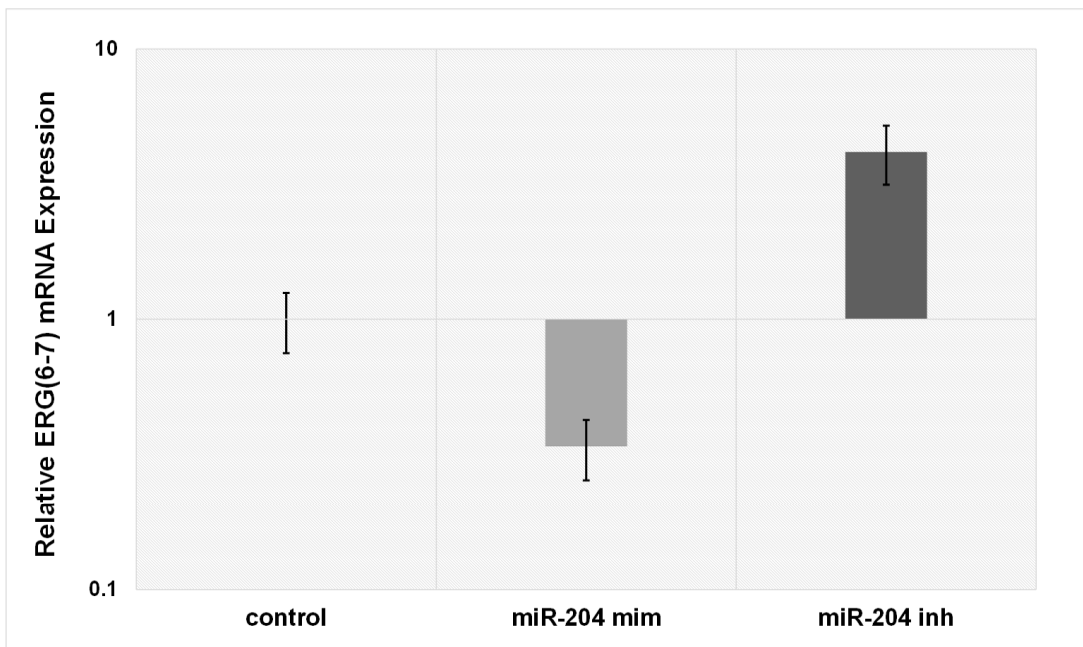

Supplement: 12672_2016_279_MOESM3_ESM.pdf [file 12672_2016_279_MOESM3_ESM.pdf]
