# Supplementary material
Source: PubMed Central journal article supplement (PMC10355945)

**Supporting Information Fig. S4. (A-B) Relative *ERG*(5-6) (A) and *ERG*(6-7) (B) Fold Expression in VCaP cells after siRNA RUNX2, siRNA ETS1, or non-targeting control transfection.**

**A**

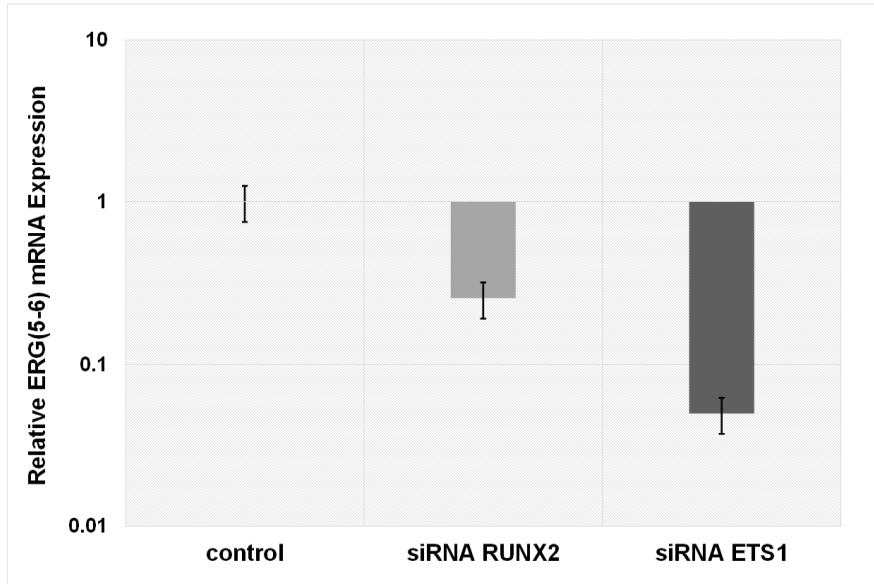

**B**

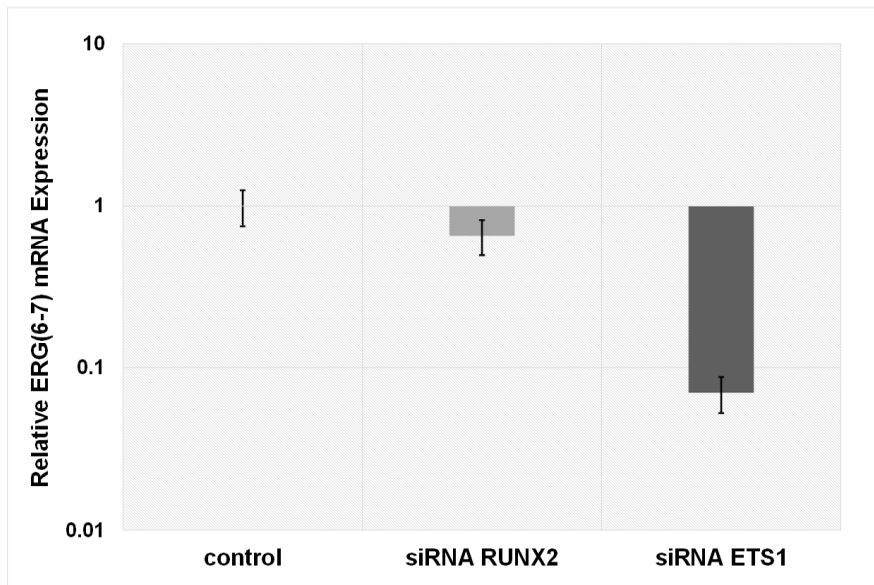

Supplement: 12672_2016_279_MOESM4_ESM.pdf [file 12672_2016_279_MOESM4_ESM.pdf]
