# Supplementary material
Source: PubMed Central journal article supplement (PMC10355945)

**Supporting Information Fig. S5. (A)** TMPRSS2:ERG protein expression in patients' sera and VCaP positive control. Values were calculated in [molecules/uL serum], using proteomics detected quantity of TMPRSS2:ERG protein in VCaP. **(B)** *TMPRSS2:ERG* mRNA Relative Expression in patients' sera, normalized to VCaP cells basal expression.

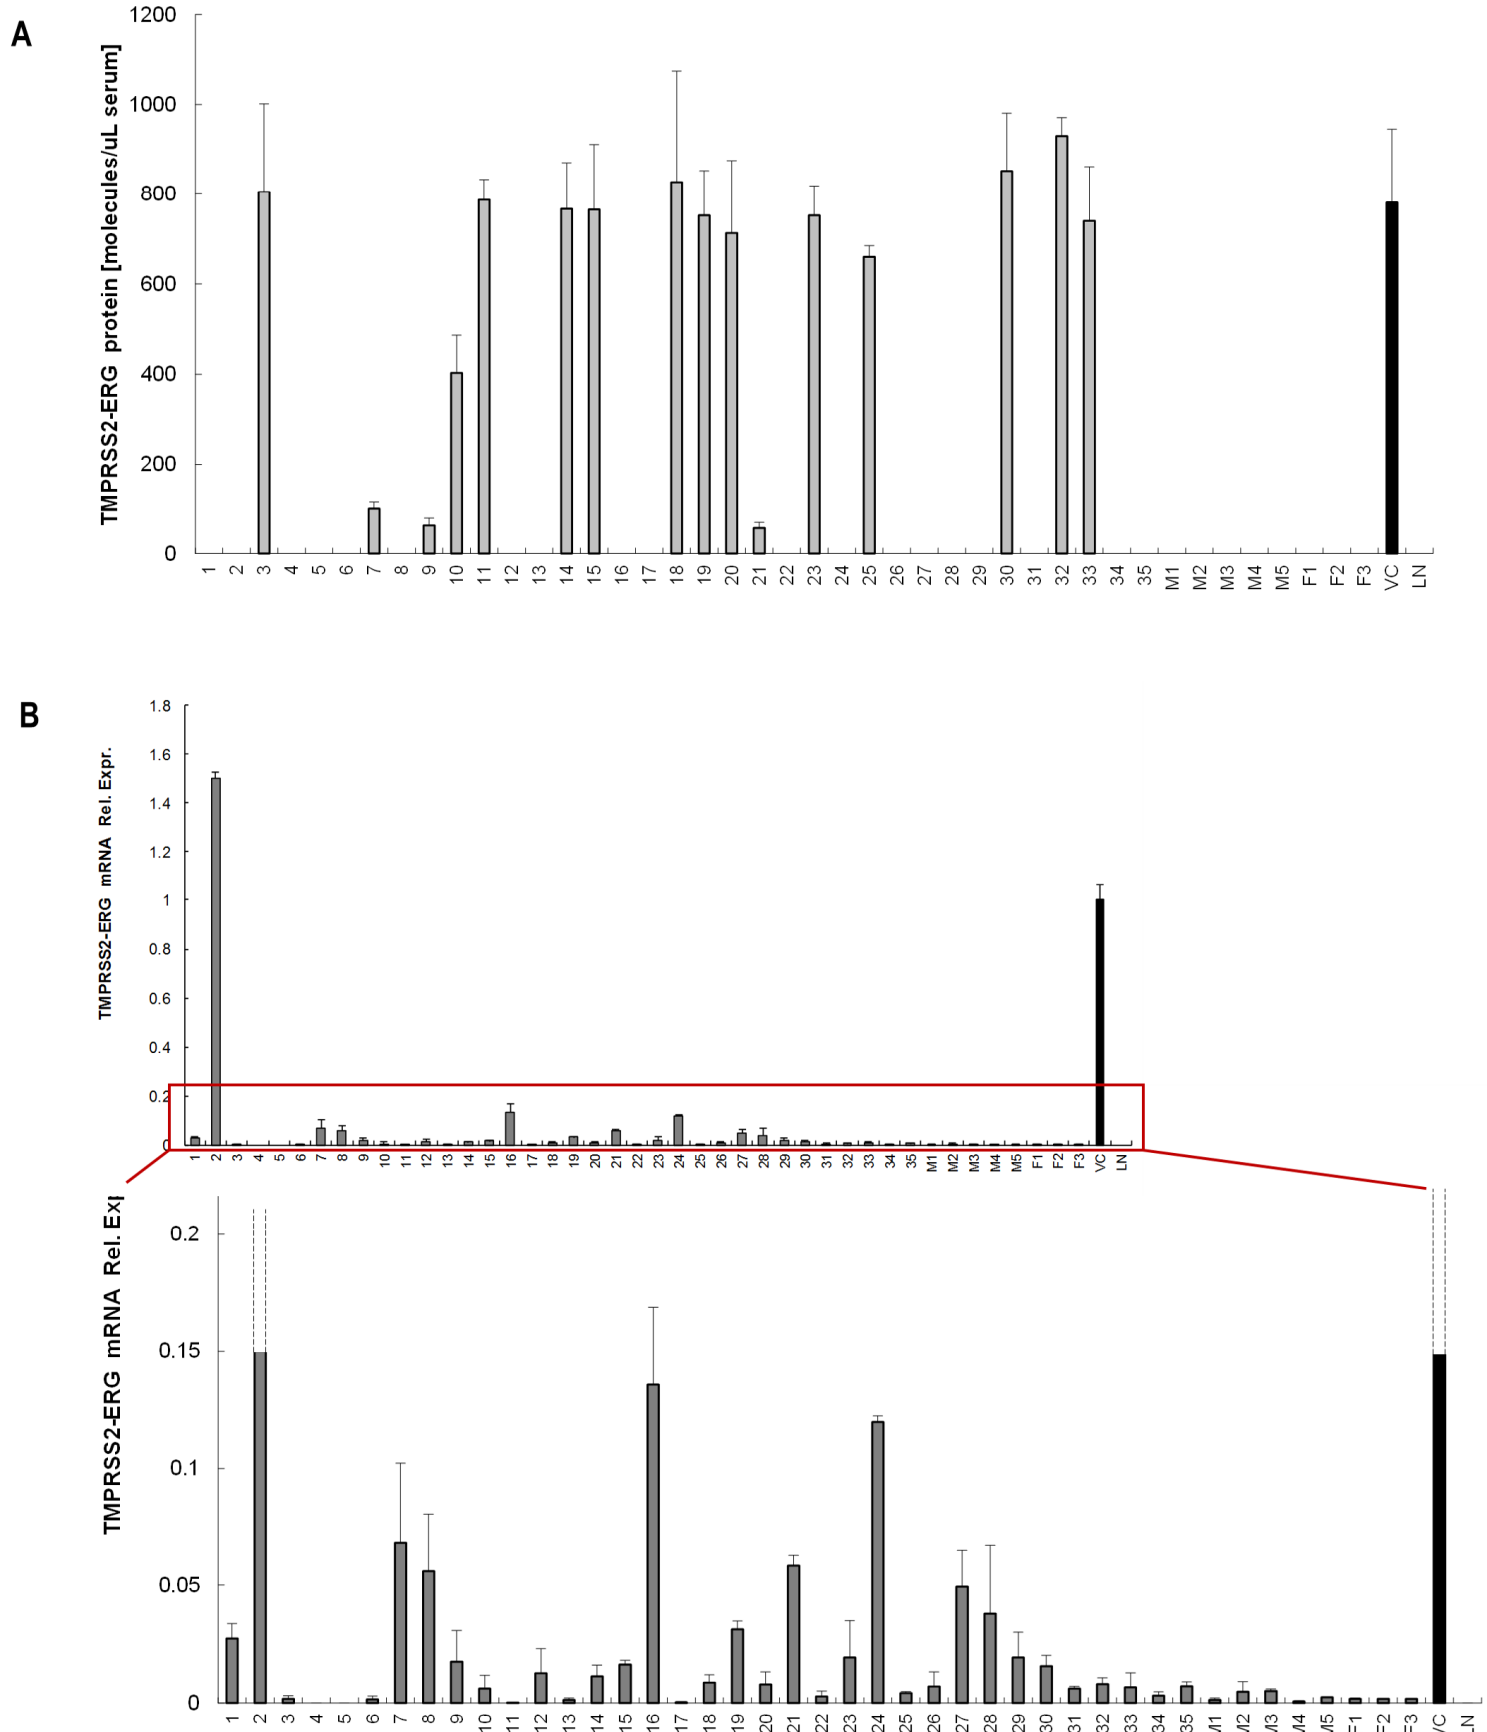

Supplement: 12672_2016_279_MOESM5_ESM.pdf [file 12672_2016_279_MOESM5_ESM.pdf]
