# Supplementary material
Source: PubMed Central journal article supplement (PMC10355945)

**Supporting Information Fig. S6. (A)** Relative *ERG(5-6)* mRNA Relative Expression patients' sera, normalized to VCaP cells basal expression. **(B)** Relative *ERG(6-7)* mRNA Relative Expression patients' sera, normalized to VCaP cells basal expression.

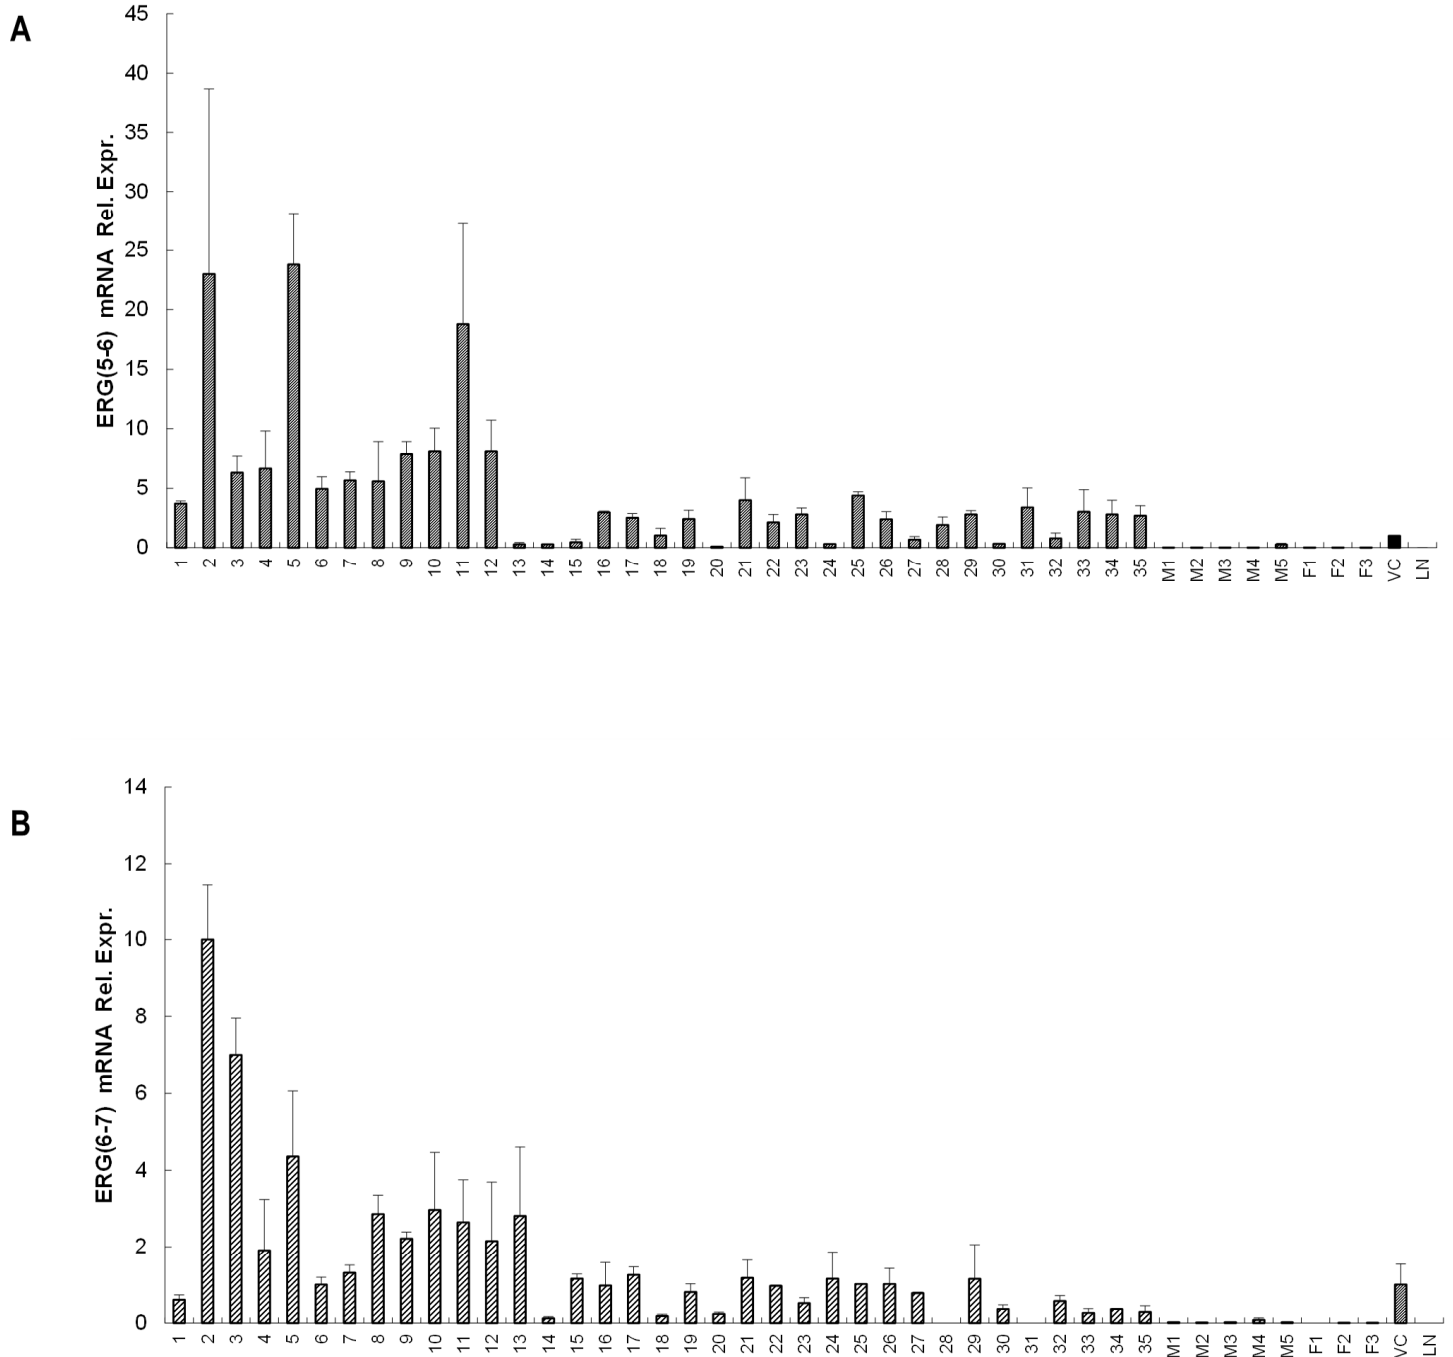

Supplement: 12672_2016_279_MOESM6_ESM.pdf [file 12672_2016_279_MOESM6_ESM.pdf]
