# Supplementary material
Source: PubMed Central journal article supplement (PMC10355945)

**Supporting Information Fig. S7. (A-B)** CpG island selection using MethylPrimer (ABI, US) in TMPRSS2 (chr21:42836478:42882086:-1) promoter region sequence (A) and in the region spanning between 5' UTR and exon-1 of androgen receptor (chrX:66763874:66950461) (B). (C) Melting curves and amplification plots of MS-qPCR amplification products in total DNA from LNCaP and VCaP cells when methylation-specific primers (MSP) and bisulfite-specific primers (BSP) were used.

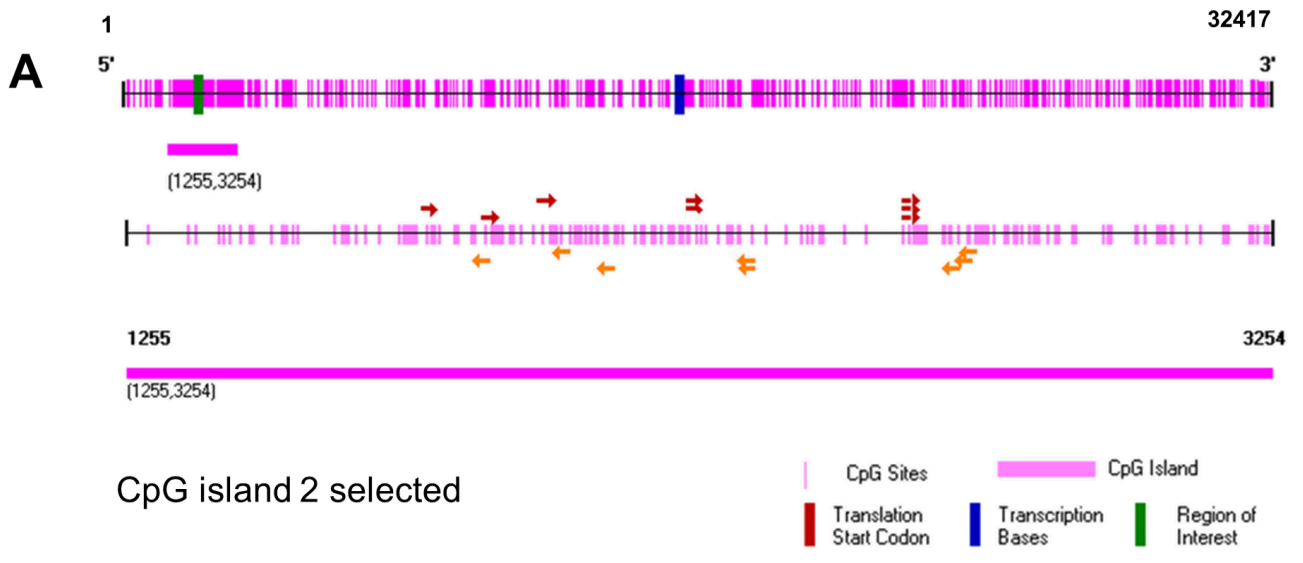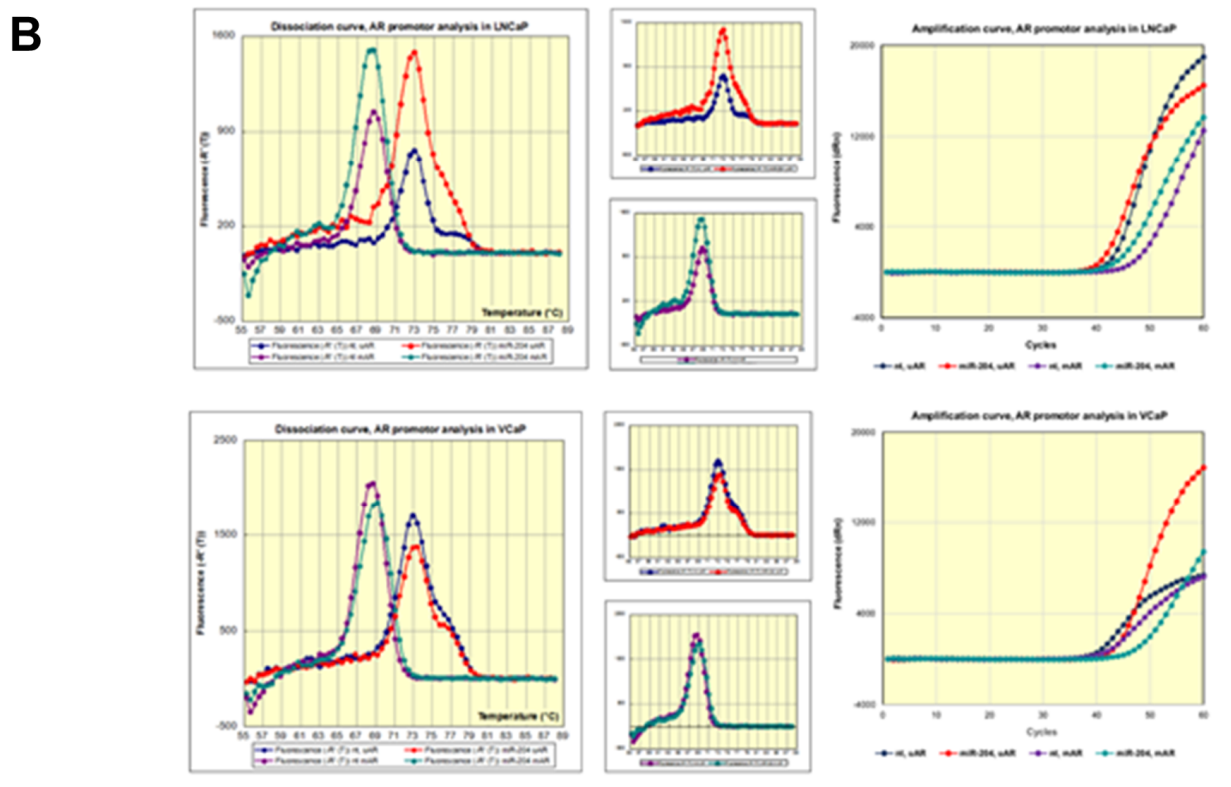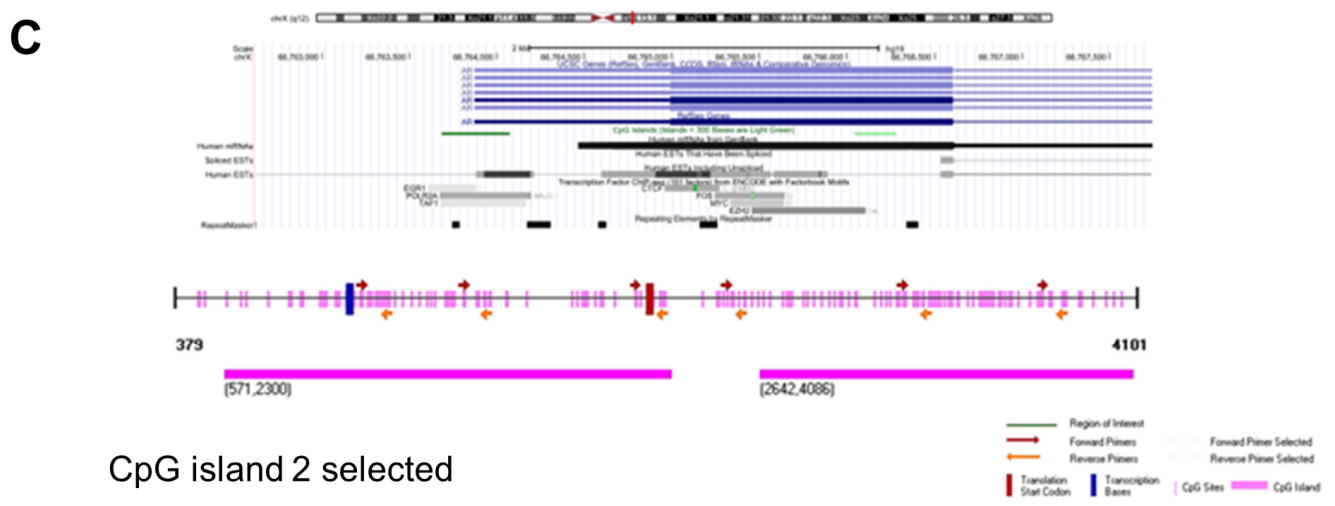

Supplement: 12672_2016_279_MOESM7_ESM.pdf [file 12672_2016_279_MOESM7_ESM.pdf]
