# Supplementary material
Source: PubMed Central journal article supplement (PMC10355945)

**Supporting Information Fig. S8. (A)** Box-plot of normalized peptide spectral counts from LTQ Orbitrap data. Samples – VCaP cells transfected with miR-204 mimic or non-targeting control. (B) MA-Plot FC of Quantile normalized peptide spectral counts. MA-Plot FC (fold change): The data are represented as point with coordinates  $\{Mg', Ag\}$ , where  $g$  is the specific gene id, and  $Mg'$  represents actually  $\log FC$ . The  $\log FC$  is the log of the ratio of the predicted expression levels in both biological groups, whereas  $Ag$  indicates the average expression level. Thus the data are plotted normalized to the control group average expression (i.e. over  $Ag = 0$ , x-axis) vs  $\log FC$  ( $\log FC$ , y-axis), colored by FDR significance cutoff ( $FDR < 0.05$  in red, others in blue).  $M = \log_2 (D1/D2)$ ,  $A = 0.5 * \log_2 (D1 * D2)$ . Colors: green (data), LOESS line (red).

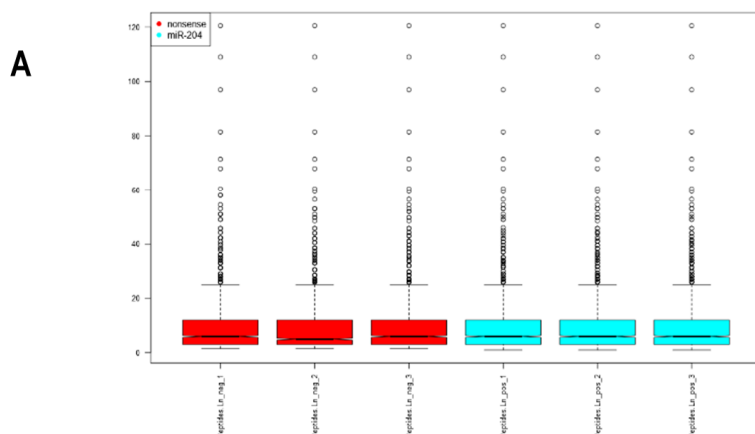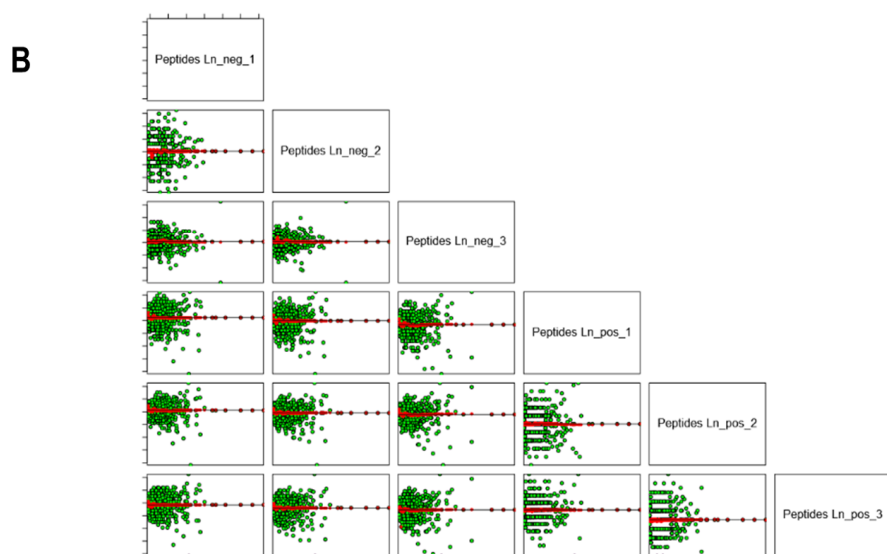

Supplement: 12672_2016_279_MOESM8_ESM.pdf [file 12672_2016_279_MOESM8_ESM.pdf]
