# Supplementary material
Source: PubMed Central journal article supplement (PMC10355945)
Supplement: 12672_2016_279_MOESM11_ESM.pdf [file 12672_2016_279_MOESM11_ESM.pdf]

# Supporting Information Fig. S11. EGAN hyper-geometric enrichment graph annotated for GO terms related to epigenetic regulation.

- ACTC1
- PGK1
- EEF1A1
- VCP
- GPI
- HSPD1
- NSUN2
- RAB3B
- TPMT
- AHCY
- MDH2
- FASN
- PRMT5
- CS
- MAT2A
- KRT18
- GAMT
- ACTN4
- TUBA1B
- GAPDH
- TRMT61A
- ZFP57

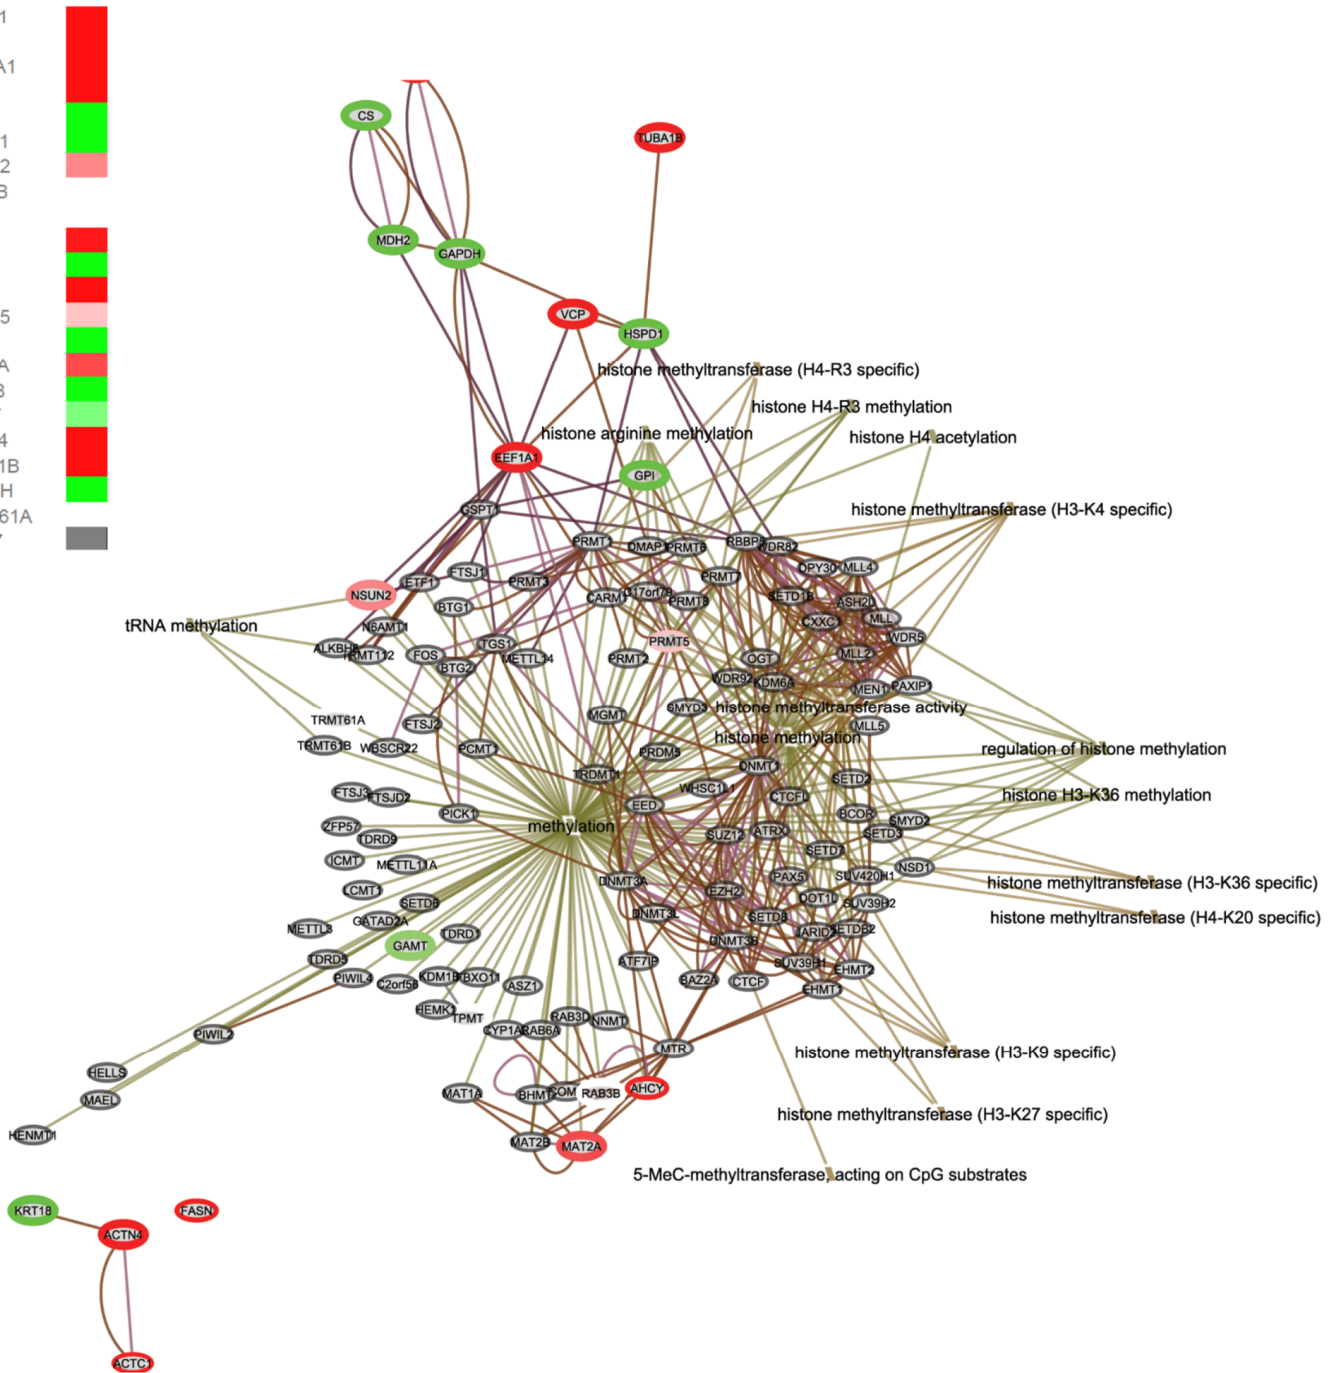

## Node Types

- Entrez Gene
- Gene Ontology Function
- Gene Ontology Process

## Edge Types

- All Protein-protein
- Yeast Protein-protein
- Chromosomal Sequence
- PubMed Co-occurrence
